# Supplementary material for: Excitation wavelength-dependent tunable color Te4+-doped Cs2ZrCl6 vacancy-ordered perovskites for optical anti-counterfeiting
Source: Royal Society of Chemistry journal article supplement (doi:10.1039/d4nj01645a), 2024-01-01
Supplement: d4nj01645a1.pdf [file d4nj01645a1.pdf]

**Excitation wavelength-dependent tunable color Te<sup>4+</sup> doped Cs<sub>2</sub>ZrCl<sub>6</sub> vacancy-ordered perovskite for optical anti-counterfeit**

*Yu Qi*<sup>a,1</sup>, *Chengyue Xin*<sup>a,2</sup>, *Wenjun Zhang*<sup>\* a,3</sup>, *Zhongfa Li*<sup>a,4</sup>, *Zihan Chen*<sup>a,5</sup>, *Zhongyu Duan*<sup>a,6</sup>

**<sup>a</sup> School of Chemical Engineering, Hebei University of Technology  
Tianjin, 300130, China.**

**\* E-mail: [wjzhang@hebut.edu.cn](mailto:wjzhang@hebut.edu.cn)**

**\* E-mail: [zyduan@hebut.edu.cn](mailto:zyduan@hebut.edu.cn)**

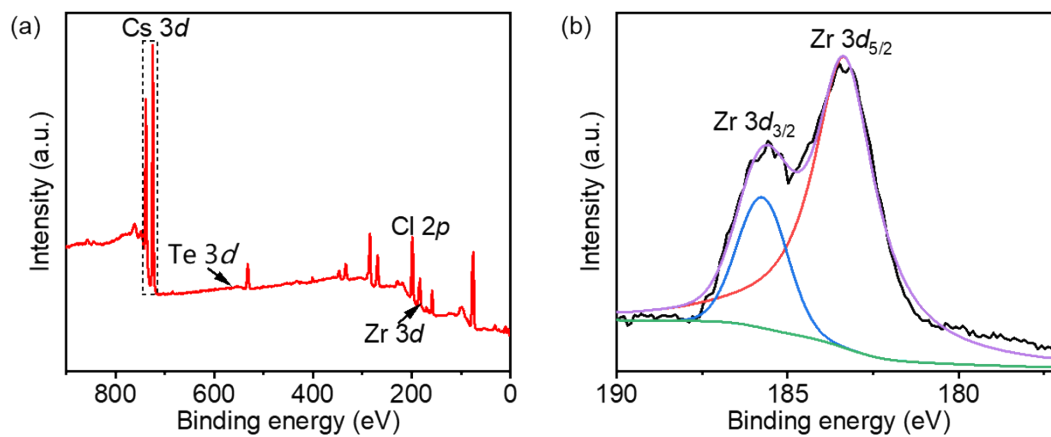

**Figure S1.** (a) XPS survey spectrum of 0.15% Te<sup>4+</sup> doped Cs<sub>2</sub>ZrCl<sub>6</sub>; (b) XPS spectra and peak fitting for Zr 3d.

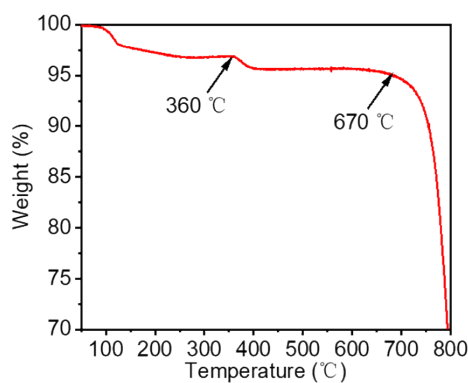

**Figure S2.** TGA spectra for 0.15% Te<sup>4+</sup> doped Cs<sub>2</sub>ZrCl<sub>6</sub>.

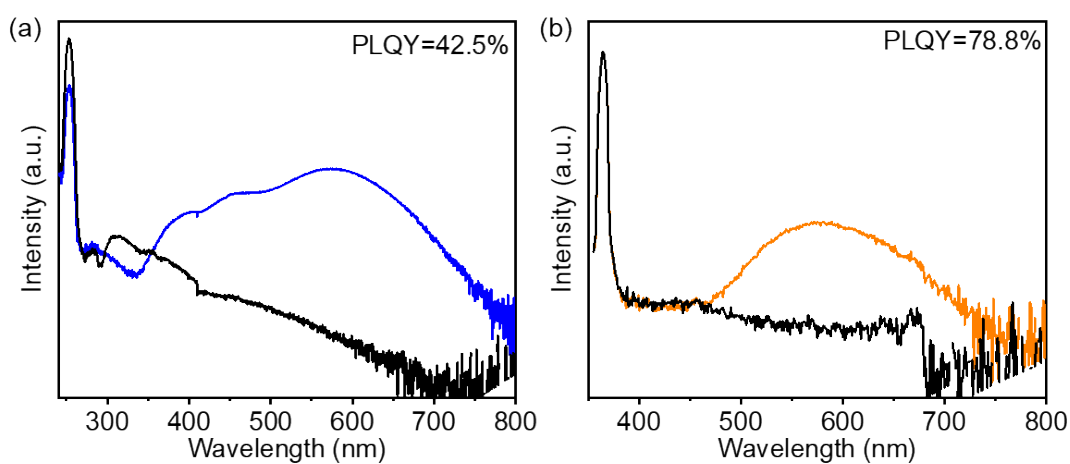

**Figure S3.** PL spectra for PLQY of 0.15% Te<sup>4+</sup> doped Cs<sub>2</sub>ZrCl<sub>6</sub>: (a) excitation by 254 nm; (b) excitation by 365 nm.
